# Supplementary material
Source: Springer Nature journal article supplement (https://www.springermedizin.de/resource/supplementary/13012_2009_249_MOESM1_ESM.pdf/9629554)
Supplement: MOESM1 [file 9629554]

Six primary care health centres selected

- 3 usual care sites
- 3 intervention sites

T0: Collect baseline data among all GPs, NPs, and GP-assistants (N = 82) on self-reported attitudes, experienced barriers, and self-reported behaviour with regard to culturally appropriate care delivery

3 Usual Care Sites (N = 35)  
Response: N = 23 (66%)

Usual Care

3 Intervention Sites (N = 47)  
Response: N = 45 (96%)

Intervention

- Hypertension care providers receive:
- Written information about six tools to support culturally appropriate HTN education
  - Information meetings (GPs)
  - Training in culturally appropriate HTN education (NPs and GP assistants)
  - Feedback meetings (NPs and GP assistants)

T1: Collect data among GPs, NPs, and GP-assistants (N = 68) on self-reported attitudes, experienced barriers, and self-reported behaviour with regard to culturally appropriate care delivery at nine months.

3 Usual Care Sites (N = 23)  
Response: N = 17 (74%)

3 Intervention Sites (N = 45)  
Response: N = 32 (71%)

Assessment of response change (T1-T0):

- Self-reported attitudes towards culturally appropriate care
- Experienced barriers towards culturally appropriate health care in general
- Experienced barriers towards culturally appropriate cardiovascular care and education
- Self reported actions in delivering culturally appropriate care
